# Supplementary material for: Photocatalytic Performance of Functionalized Biopolymer for Neodymium (III) Sorption and the Recovery from Leachate Solution
Source: MDPI journal article supplement (doi:10.3390/catal13040672), 2023-03-30
Supplement: s1 [file s1]

# Photocatalytic Performance of Functionalized Biopolymer for Neodymium (III) Sorption and the Recovery from Leachate Solution

Mohammed F. Hamza,<sup>1,2,\*</sup> Hamed Mira<sup>2</sup>, Mahmoud S. Khalafalla,<sup>2</sup> Ji Wang,<sup>1\*</sup> Yuezhou Wei,<sup>1,3</sup> Xiangbiao Yin<sup>1</sup>, Shunyan Ning<sup>1</sup>, Khalid Althumayri<sup>4</sup>, Amr Fouda<sup>5</sup>

<sup>1</sup>School of Nuclear Science and Technology, University of South China, Hengyang 421001, China; [m\\_fouda21@usc.edu.cn](mailto:m_fouda21@usc.edu.cn) (M.F.H.), [yzwei@usc.edu.cn](mailto:yzwei@usc.edu.cn) (Y.W.); [ningshunyan@usc.edu.cn](mailto:ningshunyan@usc.edu.cn) (S.N), [yinxb@usc.edu.cn](mailto:yinxb@usc.edu.cn) (XY), [wangji@usc.edu.cn](mailto:wangji@usc.edu.cn) (J.W)

<sup>2</sup>Nuclear Materials Authority, POB 530, El-Maadi, Cairo 11728, Egypt; [m\\_fouda21@usc.edu.cn](mailto:m_fouda21@usc.edu.cn) (M.F.H.), [hamedmira@yahoo.com](mailto:hamedmira@yahoo.com) (H.M), [mahmoudsayed24@yahoo.com](mailto:mahmoudsayed24@yahoo.com) (M.S.K),

<sup>3</sup>School of Nuclear Science and Engineering, Shanghai Jiao Tong University, Shanghai 200240, China [yzwei@usc.edu.cn](mailto:yzwei@usc.edu.cn) (Y.W.)

<sup>4</sup>Department of chemistry, College of science, Taibah University, 30002 Al-Madinah Al-Munawarah, Saudi Arabia [Kthumairi@taibahu.edu.sa](mailto:Kthumairi@taibahu.edu.sa) (K.A)

<sup>5</sup>Botany and Microbiology Department, Faculty of Science, Al-Azhar University, Nasr City, Cairo 11884, Egypt; [amr\\_fh83@azhar.edu.eg](mailto:amr_fh83@azhar.edu.eg) (A.F.)

\* Correspondence: [m\\_fouda21@usc.edu.cn](mailto:m_fouda21@usc.edu.cn) (M.F.H.); [wangji@usc.edu.cn](mailto:wangji@usc.edu.cn) (J.W); Tel.: +20-111-668-1228 (M.F.H.); +86-771-322-4990 (Y.W.)

**Table S1.** Assignment peaks of MCH, CH-POH, CH-POH+Nd and After 5 cycles of sorption desorption

| 38 | Vibration                                  | MCH        | CH-POH      | CH-<br>POH+Nd | After 5<br>cycles |         |
|----|--------------------------------------------|------------|-------------|---------------|-------------------|---------|
| 39 | O-H and N-H Str.                           | 3412       | 3267        | 3274          | 3263              | [7-1]   |
| 40 | (overlapped)                               |            |             |               |                   |         |
| 41 | C-H aliph. (str.)                          | 2928 ,2847 | 2917, 2848  |               | 2919, 2850        | [12-8]  |
| 42 | C=O (amide) and C=N-                       | 1637       | 1691, 1621, | 1569          | 1698              | [13,14] |
| 43 | (overlapped) (str.)                        |            | 1552        |               |                   |         |
| 44 | 1°/2° amines (bend)                        | 1542       |             |               | 1575              | [15,16] |
| 45 | C-H asym. (bend)                           | 1380       | 1431        | 1396          | 1415              | [17,18] |
| 46 | P=O (asym.)                                |            | 1348        |               | 1370              | [19,20] |
| 47 | O-H (in-plane) bend                        | 1161       | 1261, 1236  | 1147          | 1311              | [21,22] |
| 48 | P(O) (phosphate(str.))                     |            | 1053        | 1126          | 1137              | [19]    |
| 49 | C-O, C-O-C and C-N (str.)                  | 1019       | 1006        | 1024          | 1024              | [23]    |
|    | P-O-C (str.)                               |            | 908         | 946, 890      | 892               | [19]    |
|    | -(CH <sub>2</sub> ) <sub>n</sub> - rocking | 882        | 827         | 811           | 795               | [24]    |
|    | P-O-C (str.)                               |            | 609         |               | 596               | [19,20] |
|    | Fe-O                                       | 570        | 561         | 617           | 549               | [25]    |

**Table S2.** Elemental analysis of MCH and CH-POH sorbents

|               | <b>C</b> | <b>N</b> | <b>H</b> | <b>O</b> | <b>Fe</b> | <b>P</b> |
|---------------|----------|----------|----------|----------|-----------|----------|
| MCH [%]       | 27.35    | 4.12     | 5.06     | 30.22    | 33.25     | 0        |
| MCH [m mol]   | 22.77    | 2.94     | 50.2     | 18.89    | 5.95      | 0        |
| MCH-NPOH [%]  | 22.96    | 5.58     | 4.98     | 36.92    | 26.61     | 2.95     |
| M MOL [m mol] | 19.12    | 3.98     | 49.4     | 23.08    | 4.76      | 0.95     |

**Table S3a.** Reminder on equations used for modeling sorption isotherms [26-28].

| Model      | Equation                                                             | Parameters                                                                                                                             | Ref. |
|------------|----------------------------------------------------------------------|----------------------------------------------------------------------------------------------------------------------------------------|------|
| Langmuir   | $q_{eq} = \frac{q_{m,L}C_{eq}}{1 + b_L C_{eq}}$                      | $q_{m,L}$ (mmol g <sup>-1</sup> ): Sorption capacity at saturation of monolayer<br>$b_L$ (L mmol <sup>-1</sup> ): Affinity coefficient | [26] |
| Freundlich | $q_{eq} = k_F C_{eq}^{1/n_F}$                                        | $k_F$ and $n_F$ : empirical parameters of Freundlich equation                                                                          | [26] |
| Sips       | $q_{eq} = \frac{q_{m,S} b_S C_{eq}^{1/n_S}}{1 + b_S C_{eq}^{1/n_S}}$ | $q_{m,L}$ , $b_S$ and $n_S$ : empirical parameters of Sips equation (based on Langmuir and Freundlich equations)                       | [26] |

**Table S3b.** Reminder on equations used for modeling uptake kinetics [26,29] [30].

| Model | Equation                                                                                                                                                                                                                                                                                  | Parameters                                                                                                                                               | Ref. |
|-------|-------------------------------------------------------------------------------------------------------------------------------------------------------------------------------------------------------------------------------------------------------------------------------------------|----------------------------------------------------------------------------------------------------------------------------------------------------------|------|
| PFORE | $q(t) = q_{eq,1}(1 - e^{-k_1 t})$                                                                                                                                                                                                                                                         | $q_{eq,1}$ (mmol g <sup>-1</sup> ): sorption capacity at equilibrium<br>$k_1$ (min <sup>-1</sup> ): apparent rate constant of PFORE                      | [30] |
| PSORE | $q(t) = \frac{q_{eq,2}^2 k_2 t}{1 + k_2 q_{eq,2} t}$                                                                                                                                                                                                                                      | $q_{eq,2}$ (mmol g <sup>-1</sup> ): sorption capacity at equilibrium<br>$k_2$ (g mmol <sup>-1</sup> min <sup>-1</sup> ): apparent rate constant of PSORE | [30] |
| RIDE  | $\frac{q(t)}{q_{eq}} = 1 - \sum_{n=1}^{\infty} \frac{6\alpha(\alpha + 1)\exp\left(\frac{-D_e q_n^2}{r^2} t\right)}{9 + 9\alpha + q_n^2 \alpha^2}$<br>With $q_n$ being the non-zero roots of<br>$\tan q_n = \frac{3 q_n}{3 + \alpha q_n^2}$ and $\frac{m q}{V C_0} = \frac{1}{1 + \alpha}$ | $D_e$ (m <sup>2</sup> min <sup>-1</sup> ): Effective diffusivity coefficient                                                                             | [29] |

(m (g): mass of sorbent; V (L): volume of solution; C<sub>0</sub> (mmol L<sup>-1</sup>): initial concentration of the solution).

Akaike Information Criterion, AIC:

$$AIC = N \ln \left( \frac{\sum_{i=0}^N (y_{i,exp.} - y_{i,model})^2}{N} \right) + 2N_p + \frac{2N_p(N_p + 1)}{N - N_p - 1}$$

Where N is the number of experimental points, N<sub>p</sub> the number of model parameters, y<sub>i,exp.</sub> and y<sub>i,model</sub> the experimental and calculated values of the tested variable.

**Table S4.** XRF analysis of the study ore materials.

| Major oxides (%)                                | Wt. (%) | Trace elements | ppm  |
|-------------------------------------------------|---------|----------------|------|
| SiO <sub>2</sub>                                | 76.51   | U              | 1117 |
| Al <sub>2</sub> O <sub>3</sub>                  | 8.56    | REE            | 1296 |
| TiO <sub>2</sub>                                | 0.95    | Mn             | 35.4 |
| Fe <sub>2</sub> O <sub>3</sub> <sup>total</sup> | 3.26    | Zn             | 86.4 |
| CaO                                             | 1.19    |                |      |
| MgO                                             | 0.45    |                |      |
| Na <sub>2</sub> O                               | 0.43    |                |      |
| K <sub>2</sub> O                                | 1.18    |                |      |
| P <sub>2</sub> O <sub>5</sub>                   | 0.49    |                |      |
| L.O.I                                           | 5.68    |                |      |
| Total                                           | 98.7    |                |      |

**Table S5.** Chemical composition of the prepared carbonate leach liquor at (pH=0.3)

| Constituent                    | Conc. (mg/L) | Constituent | Conc. (mg/L) |
|--------------------------------|--------------|-------------|--------------|
| Fe                             | 2690         | Ca          | 448          |
| Al <sub>2</sub> O <sub>3</sub> | 2538         | U           | 388          |
| Mg                             | 350          | REE         | 451          |

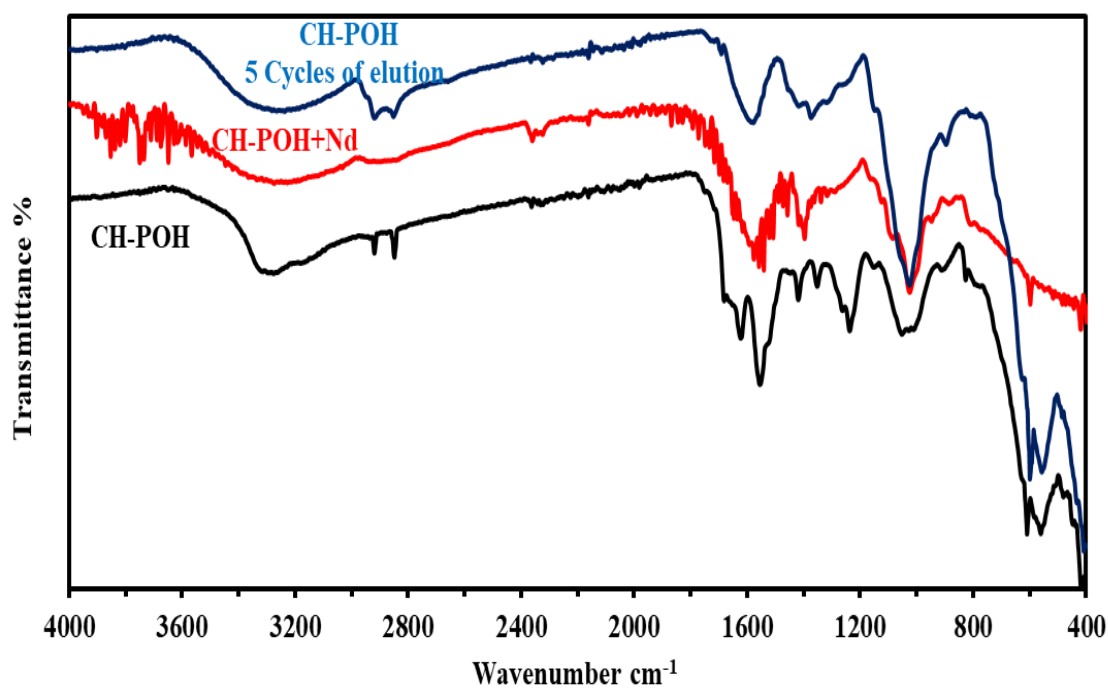

Figure S1. The full range of the FTIR spectra.



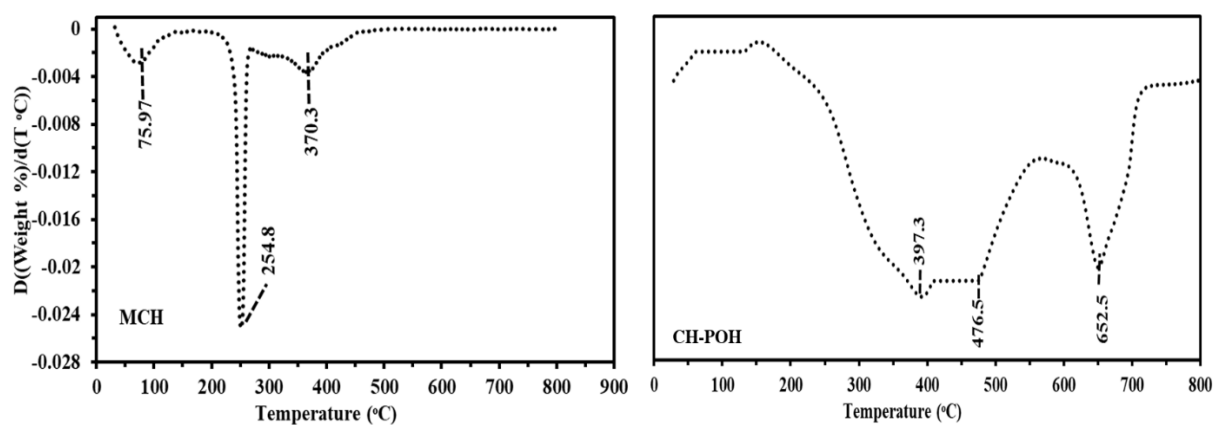

**Figure S2.** DrTG of chitosan magnetite (MCH) and functionalized sorbent (CH-POH)

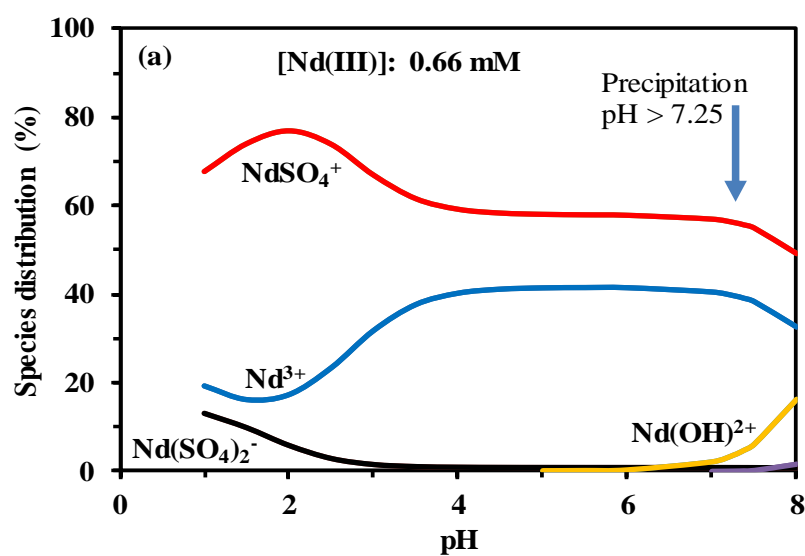

Figure S3. Speciation diagrams for Nd(III) under the experimental conditions

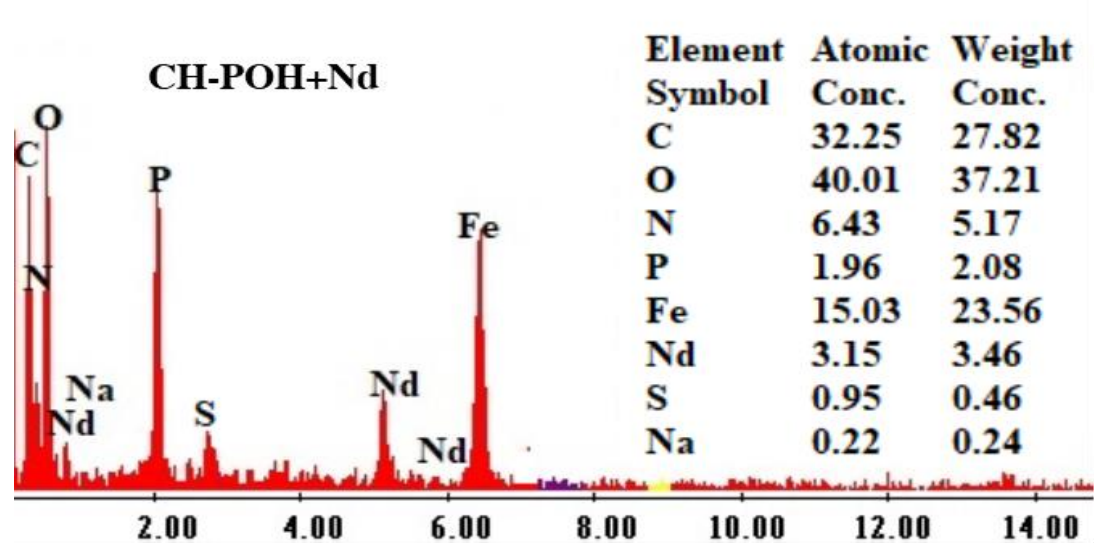

Figure S4. EDX analysis of the CH-POH after Nd(III) sorption

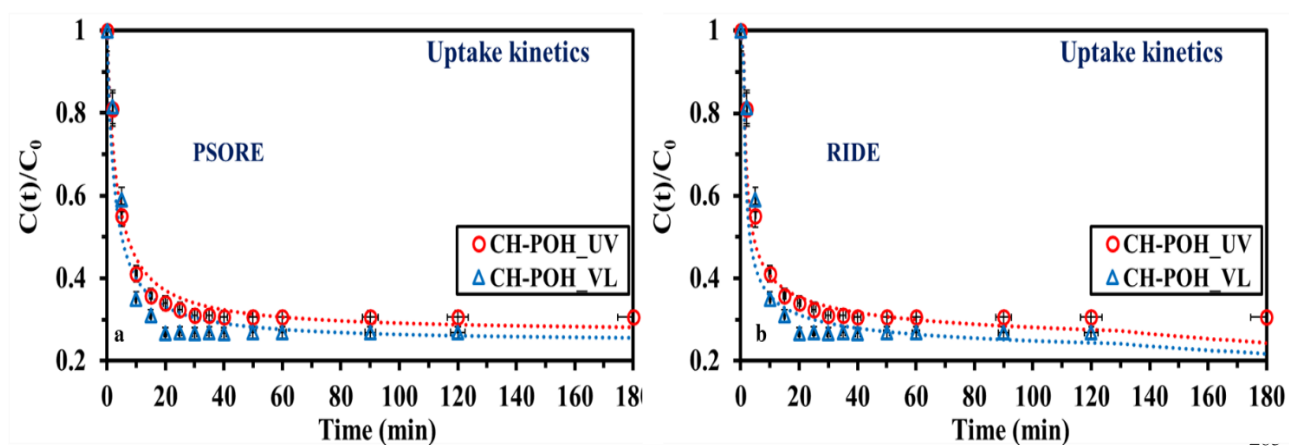

**Figure S5.** The unfitted profiles of the PSORE and RIDE for CH-POH sorbent, ( $\text{pH}_0$ : 4;  $C_0$ : 0.36 mmol Cd L<sup>-1</sup>; SD: 0.66 g L<sup>-1</sup>; T: 21 ± 1 °C; v: 210 rpm).

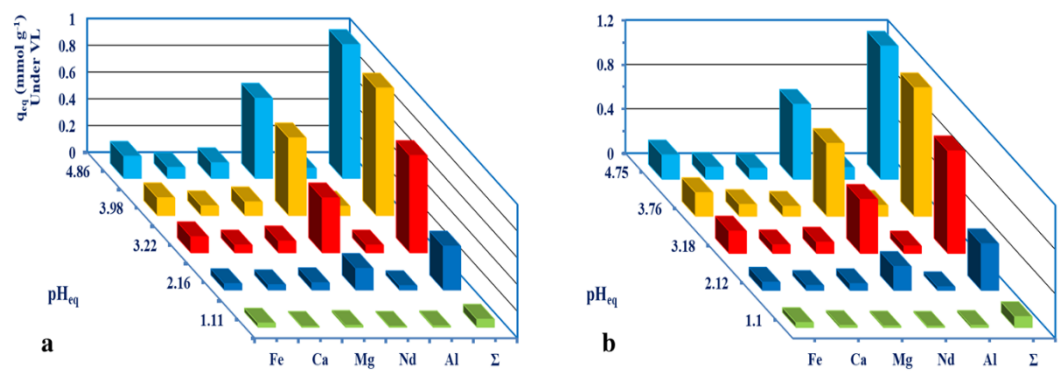

**Figure S6.** Total sorption capacity of CH-POH in polymetallic equimolar solution under VL(a) and (UV) conditions

## References

1. Hamza, M.F.; El Aassy, I.E.; Ahmed, F.Y.; Abdel-Rahman, A.A.-H.; Atta, A.M. Separation of uranium and rare earth elements with high purity from low-grade gibbsite-bearing shale ore by different chelating resins. *Journal of dispersion science and technology* **2012**, *33*, 482-489.
2. Fouda, A.; Salem, S.S.; Wassel, A.R.; Hamza, M.F.; Shaheen, T.I. Optimization of green biosynthesized visible light active CuO/ZnO nano-photocatalysts for the degradation of organic methylene blue dye. *Heliyon* **2020**, *6*, e04896.
3. Zhang, H.; Li, C.; Chen, X.; Fu, H.; Chen, Y.; Ning, S.; Fujita, T.; Wei, Y.; Wang, X. Layered ammonium vanadate nanobelt as efficient adsorbents for removal of Sr<sup>2+</sup> and Cs<sup>+</sup> from contaminated water. *Journal of Colloid and Interface Science* **2022**, *615*, 110-123.
4. Fouda, A.; Eid, A.M.; Guibal, E.; Hamza, M.F.; Hassan, S.E.-D.; Alkhalifah, D.H.M.; El-Hossary, D. Green Synthesis of Gold Nanoparticles by Aqueous Extract of Zingiber officinale: Characterization and Insight into Antimicrobial, Antioxidant, and In Vitro Cytotoxic Activities. *Applied Sciences* **2022**, *12*, 12879.
5. Chen, Y.; Ning, S.; Zhong, Y.; Li, Z.; Wang, J.; Chen, L.; Yin, X.; Fujita, T.; Wei, Y. Study on highly efficient separation of zirconium from scandium with TODGA-modified macroporous silica-polymer based resin. *Separation and Purification Technology* **2023**, *305*, 122499.
6. Hamza, M.F.; Salih, K.A.; Adel, A.-H.; Zayed, Y.E.; Wei, Y.; Liang, J.; Guibal, E. Sulfonic-functionalized algal/PEI beads for scandium, cerium and holmium sorption from aqueous solutions (synthetic and industrial samples). *Chemical Engineering Journal* **2021**, *403*, 126399.
7. Hamza, M.F.; Guibal, E.; Althumayri, K.; Vincent, T.; Yin, X.; Wei, Y.; Li, W. New Process for the Sulfonation of Algal/PEI Biosorbent for Enhancing Sr (II) Removal from Aqueous Solutions—Application to Seawater. *Molecules* **2022**, *27*, 7128.
8. Hamza, M.F.; Adel, A.-H.; Hawata, M.A.; El Araby, R.; Guibal, E.; Fouda, A.; Wei, Y.; Hamad, N.A. Functionalization of magnetic chitosan microparticles—Comparison of trione and trithione grafting for enhanced silver sorption and application to metal recovery from waste X-ray photographic films. *Journal of Environmental Chemical Engineering* **2022**, *10*, 107939.
9. Fouda, A.; Awad, M.A.; AL-Faifi, Z.E.; Gad, M.E.; Al-Khalaf, A.A.; Yahya, R.; Hamza, M.F. Aspergillus flavus-Mediated Green Synthesis of Silver Nanoparticles and Evaluation of Their Antibacterial, Anti-Candida, Acaricides, and Photocatalytic Activities. *Catalysts* **2022**, *12*, 462.
10. Fouda, A.; Eid, A.M.; Abdel-Rahman, M.A.; El-Belely, E.F.; Awad, M.A.; Hassan, S.E.-D.; Al-Faifi, Z.E.; Hamza, M.F. Enhanced antimicrobial, cytotoxicity, larvicidal, and repellence activities of brown algae, cystoseira crinita-mediated green synthesis of magnesium oxide nanoparticles. *Frontiers in Bioengineering and Biotechnology* **2022**, *10*.
11. Hamza, M.F.; Abu Khoziem, H.A.; Khalafalla, M.S.; Abdellah, W.M.; Zaki, D.I.; Althumayri, K.; Wei, Y. Ecofriendly Composite as a Promising Material for Highly-Performance Uranium Recovery from Different Solutions. *Toxics* **2022**, *10*, 490.
12. Fouda, A.; Hassan, S.E.-D.; Eid, A.M.; Awad, M.A.; Althumayri, K.; Badr, N.F.; Hamza, M.F. Endophytic bacterial strain, Brevibacillus brevis-mediated green synthesis of copper oxide nanoparticles, characterization, antifungal, in vitro cytotoxicity, and larvicidal activity. *Green Processing and Synthesis* **2022**, *11*, 931-950.
13. Hamza, M.F.; Mira, H.; Wei, Y.; Aboelenin, S.M.; Guibal, E.; Salem, W.M. Sulfonation of chitosan for enhanced sorption of Li (I) from acidic solutions—Application to metal recovery from waste Li-ion mobile battery. *Chemical Engineering Journal* **2022**, *441*, 135941.
14. Hamza, M.F.; Wei, Y.; Khalafalla, M.S.; Abed, N.S.; Fouda, A.; Elwakeel, K.Z.; Guibal, E.; Hamad, N.A. U (VI) and Th (IV) recovery using silica beads functionalized with urea-or thiourea-based polymers—Application to ore leachate. *Science of the Total Environment* **2022**, *821*, 153184.

15. Hamza, M.F.; Goda, A.E.-S.; Ning, S.; Mira, H.I.; Abdel-Rahman, A.A.-H.; Wei, Y.; Fujita, T.; Amer, H.H.; Alotaibi, S.H.; Fouda, A. Photocatalytic Efficacy of Heterocyclic Base Grafted Chitosan Magnetite Nanoparticles on Sorption of Pb (II); Application on Mining Effluent. *Catalysts* **2022**, *12*, 330.
16. Hamza, M.F.; Alotaibi, S.H.; Wei, Y.; Mashaal, N.M. High-Performance Hydrogel Based on Modified Chitosan for Removal of Heavy Metal Ions in Borehole: A Case Study from the Bahariya Oasis, Egypt. *Catalysts* **2022**, *12*, 721.
17. Fouda, A.; Hassan, S.E.-D.; Saied, E.; Hamza, M.F. Photocatalytic degradation of real textile and tannery effluent using biosynthesized magnesium oxide nanoparticles (MgO-NPs), heavy metal adsorption, phytotoxicity, and antimicrobial activity. *Journal of Environmental Chemical Engineering* **2021**, *9*, 105346.
18. Hamza, M.F.; Wei, Y.; Guibal, E. Quaternization of algal/PEI beads (a new sorbent): Characterization and application to scandium sorption from aqueous solutions. *Chemical Engineering Journal* **2020**, *383*, 123210.
19. Lin-Vien, D.; Colthup, N.B.; Fateley, W.G.; Grasselli, J.G. CHAPTER 16 - Organophosphorus Compounds. In *The Handbook of Infrared and Raman Characteristic Frequencies of Organic Molecules*, Lin-Vien, D., Colthup, N.B., Fateley, W.G., Grasselli, J.G., Eds.; Academic Press: San Diego, 1991; pp. 263-276.
20. Coates, J. Interpretation of Infrared Spectra, A Practical Approach. In *Encyclopedia of Analytical Chemistry* John Wiley & Sons, Ltd.: 2006; pp. 1-23.
21. Hamza, M.F.; Hamad, N.A.; Hamad, D.M.; Khalafalla, M.S.; Abdel-Rahman, A.A.-H.; Zeid, I.F.; Wei, Y.; Hessien, M.M.; Fouda, A.; Salem, W.M. Synthesis of eco-friendly biopolymer, alginate-chitosan composite to adsorb the heavy metals, Cd (II) and Pb (II) from contaminated effluents. *Materials* **2021**, *14*, 2189.
22. Hamza, M.F.; Mubark, A.E.; Wei, Y.; Vincent, T.; Guibal, E. Quaternization of composite algal/PEI beads for enhanced uranium sorption—application to ore acidic leachate. *Gels* **2020**, *6*, 12.
23. Hamza, M.F.; Fouda, A.; Wei, Y.; El Aassy, I.E.; Alotaibi, S.H.; Guibal, E.; Mashaal, N.M. Functionalized biobased composite for metal decontamination—Insight on uranium and application to water samples collected from wells in mining areas (Sinai, Egypt). *Chemical Engineering Journal* **2022**, *431*, 133967.
24. Hamza, M.F.; Sallam, O.R.; Khalafalla, M.S.; Abbas, A.E.A.; Wei, Y. Geological and radioactivity studies accompanied by uranium recovery: Um Bogma Formation, southwestern Sinai, Egypt. *Journal of Radioanalytical and Nuclear Chemistry* **2020**, *324*, 1039-1051.
25. Hamza, M.F. Grafting of quaternary ammonium groups for uranium (VI) recovery: Application on natural acidic leaching liquor. *Journal of Radioanalytical and Nuclear Chemistry* **2019**, *322*, 519-532.
26. Tien, C. *Adsorption Calculations and Modeling*; Butterworth-Heinemann: Newton, MA, 1994; p. 243.
27. Lima, É.C.; Dehghani, M.H.; Guleria, A.; Sher, F.; Karri, R.R.; Dotto, G.L.; Tran, H.N. CHAPTER 3 - Adsorption: Fundamental aspects and applications of adsorption for effluent treatment. In *Green Technologies for the Defluoridation of Water*, Hadi Dehghani, M., Karri, R., Lima, E., Eds.; Elsevier: 2021; pp. 41-88.
28. Buema, G.; Lupu, N.; Chiriac, H.; Ciobanu, G.; Bucur, R.D.; Bucur, D.; Favier, L.; Harja, M. Performance assessment of five adsorbents based on fly ash for removal of cadmium ions. *J. Mol. Liq.* **2021**, *333*, 115932, doi:10.1016/j.molliq.2021.115932.
29. Crank, J. *The Mathematics of Diffusion*, 2nd. ed.; Oxford University Press: Oxford, U.K., 1975; p. 414.
30. Ho, Y.S.; McKay, G. Pseudo-second order model for sorption processes. *Process Biochem.* **1999**, *34*, 451-465, doi:10.1016/S0032-9592(98)00112-5.
